# Supplementary material for: Construction of in vitro patient-derived tumor models to evaluate anticancer agents and cancer immunotherapy
Source: PubMed Central journal article supplement — Oncol Lett. 2021 Mar 22;21(5):406. doi: 10.3892/ol.2021.12667 (PMC8020396; doi:10.3892/ol.2021.12667), 2021-03-22
Supplement: Supplementary_Data.pdf [file Supplementary_Data.pdf]

Table SI. Anticancer agents used in the present study.

| Compound     | Target                 | Supplier                                | Purity, % |
|--------------|------------------------|-----------------------------------------|-----------|
| Mitomycin C  | DNA synthesis          | FUJIFILM Wako Pure Chemical Corporation | 100       |
| Paclitaxel   | Tubulin                | TCI Co., Ltd.                           | 100       |
| Afatinib     | EGFR, HER2             | Selleck Chemicals                       | 100       |
| Lapatinib    | EGFR, HER2             | LC Laboratories                         | 100       |
| Erlotinib    | EGFR                   | Carbosynth Ltd.                         | 100       |
| Gefitinib    | EGFR                   | ChemScene LLC                           | 100       |
| Osimertinib  | EGFR                   | MedChemExpress                          | 100       |
| Rociletinib  | EGFR                   | MedChemExpress                          | 100       |
| Prednisolone | Corticosteroid         | FUJIFILM Wako Pure Chemical Corporation | 100       |
| Cytarabine   | DNA synthesis          | FUJIFILM Wako Pure Chemical Corporation | 100       |
| Doxorubicin  | DNA synthesis          | FUJIFILM Wako Pure Chemical Corporation | 100       |
| Mitoxantrone | DNA synthesis          | Selleck Chemicals                       | 100       |
| Bleomycin    | DNA synthesis          | TCI Co., Ltd.                           | 95        |
| Clofarabine  | DNA synthesis          | TCI Co., Ltd.                           | 100       |
| Dasatinib    | SRC, ABL               | Carbosynth Ltd.                         | 100       |
| Daunorubicin | DNA synthesis          | FUJIFILM Wako Pure Chemical Corporation | 100       |
| Idarubicin   | DNA topoisomerase      | Selleck Chemicals                       | 100       |
| Tretinoin    | Retinoic acid receptor | FUJIFILM Wako Pure Chemical Corporation | 83        |
| Vincristine  | Tubulin                | FUJIFILM Wako Pure Chemical Corporation | 100       |
| Imatinib     | ABL                    | Selleck Chemicals                       | 100       |
| Nelarabine   | DNA synthesis          | LKT Laboratories, Inc.                  | 100       |

EGFR, epidermal growth factor receptor.
